# Supplementary material for: Dietary Intakes of Animal and Plant Proteins and Risk of Colorectal Cancer: The EPIC-Italy Cohort
Source: MDPI journal article supplement (doi:10.3390/cancers14122917), 2022-06-13
Supplement: s1 [file s1]

**Table S1. Risks of colon and rectal cancer associated with replacement of 3% of energy from animal protein with vegetable protein, stratified by body mass index ( $\leq 25$  and  $>25$ )**

|                                                                           | Colon cancer            | P for interaction | Rectal cancer           | P for interaction <sup>3</sup> |
|---------------------------------------------------------------------------|-------------------------|-------------------|-------------------------|--------------------------------|
| <i>Body mass index <math>\leq 25</math></i>                               | <b>n. cases=157</b>     |                   | <b>n. cases =39</b>     |                                |
| <b>Animal protein replaced with vegetable protein</b>                     |                         |                   |                         |                                |
| HR <sup>1</sup> (95% CI)                                                  | 1.21 (0.98-1.48)        |                   | 0.68 (0.45-1.01)        |                                |
| HR <sup>2</sup> (95% CI)                                                  | <b>1.28 (1.03-1.59)</b> |                   | <b>0.58 (0.38-0.89)</b> |                                |
| <b>Animal protein replaced with vegetables protein from high GI foods</b> |                         |                   |                         |                                |
| HR <sup>1</sup> (95% CI)                                                  | <b>1.41 (1.13-1.77)</b> |                   | <b>0.60 (0.38-0.95)</b> |                                |
| HR <sup>2</sup> (95% CI)                                                  | <b>1.45 (1.15-1.84)</b> |                   | <b>0.55 (0.34-0.88)</b> |                                |
| <b>Animal protein replaced with vegetable protein from low GI foods</b>   |                         |                   |                         |                                |
| HR <sup>1</sup> (95% CI)                                                  | 0.91 (0.69-1.21)        |                   | 0.83 (0.50-1.37)        |                                |
| HR <sup>2</sup> (95% CI)                                                  | 0.97 (0.72-1.31)        |                   | 0.68 (0.38-1.21)        |                                |
| <i>Body mass index <math>&gt;25</math></i>                                | <b>n. cases=281</b>     |                   | <b>n. cases =62</b>     |                                |
| <b>Animal protein replaced with vegetable protein</b>                     |                         |                   |                         |                                |
| HR <sup>1</sup> (95% CI)                                                  | 1.07 (0.92-1.24)        | 0.898             | 0.83 (0.61-1.12)        | 0.294                          |
| HR <sup>2</sup> (95% CI)                                                  | 1.07 (0.92-1.24)        | 0.836             | 0.81 (0.58-1.13)        | 0.551                          |
| <b>Animal protein replaced with vegetables protein from high GI foods</b> |                         |                   |                         |                                |
| HR <sup>1</sup> (95% CI)                                                  | 1.15 (0.98-1.35)        | 0.499             | 0.79 (0.56-1.12)        | 0.764                          |
| HR <sup>2</sup> (95% CI)                                                  | 1.14 (0.97-1.34)        | 0.540             | 0.78 (0.54-1.12)        | 0.870                          |
| <b>Animal protein replaced with vegetable protein from low GI foods</b>   |                         |                   |                         |                                |
| HR <sup>1</sup> (95% CI)                                                  | 0.95 (0.78-1.15)        | 0.153             | 0.92 (0.62-1.37)        | 0.265                          |
| HR <sup>2</sup> (95% CI)                                                  | 0.93 (0.75-1.15)        | 0.185             | 0.91 (0.59-1.40)        | 0.435                          |

<sup>1</sup> Stratified by center, age, sex and adjusted for energy, alcohol and total fat intake. <sup>2</sup> Additionally adjusted for BMI, waist-hip ratio, smoking, education, physical activity and fiber intake. <sup>3</sup> Test for heterogeneity comparing BMI  $\leq 25$  and BMI  $>25$ .

| <b>Table S2. Risk of colon and rectal cancer associated with replacement of 3% of energy from animal protein and animal protein sources with plant protein, stratified by body mass index (≤ 25 and &gt;25)</b> |                         |                          |                         |                                       |
|-----------------------------------------------------------------------------------------------------------------------------------------------------------------------------------------------------------------|-------------------------|--------------------------|-------------------------|---------------------------------------|
|                                                                                                                                                                                                                 | <b>Colon cancer</b>     | <b>P for interaction</b> | <b>Rectal cancer</b>    | <b>P for interaction <sup>3</sup></b> |
| <b><i>Body mass index ≤25</i></b>                                                                                                                                                                               | <b>n. cases=157</b>     |                          | <b>n. cases =39</b>     |                                       |
|                                                                                                                                                                                                                 |                         |                          |                         |                                       |
| <b>Animal sources replaced with vegetable protein</b>                                                                                                                                                           |                         |                          |                         |                                       |
| <i>Processed and red meat</i>                                                                                                                                                                                   |                         |                          |                         |                                       |
| HR <sup>1</sup> (95% CI)                                                                                                                                                                                        | 1.15 (0.92-1.44)        |                          | <b>0.62 (0.41-0.95)</b> |                                       |
| HR <sup>2</sup> (95% CI)                                                                                                                                                                                        | 1.23 (0.97-1.56)        |                          | <b>0.53 (0.34-0.83)</b> |                                       |
| <i>Poultry</i>                                                                                                                                                                                                  |                         |                          |                         |                                       |
| HR <sup>1</sup> (95% CI)                                                                                                                                                                                        | 1.17 (0.90-1.53)        |                          | 0.67 (0.40-1.12)        |                                       |
| HR <sup>2</sup> (95% CI)                                                                                                                                                                                        | 1.20 (0.92-1.58)        |                          | 0.62 (0.36-1.07)        |                                       |
| <i>Fish</i>                                                                                                                                                                                                     |                         |                          |                         |                                       |
| HR <sup>1</sup> (95% CI)                                                                                                                                                                                        | 1.25 (0.92-1.68)        |                          | 0.74 (0.42-1.31)        |                                       |
| HR <sup>2</sup> (95% CI)                                                                                                                                                                                        | 1.26 (0.93-1.71)        |                          | 0.70 (0.39-1.25)        |                                       |
| <i>Egg and dairy products</i>                                                                                                                                                                                   |                         |                          |                         |                                       |
| HR <sup>1</sup> (95% CI)                                                                                                                                                                                        | <b>1.24 (1.01-1.53)</b> |                          | 0.72 (0.48-1.10)        |                                       |
| HR <sup>2</sup> (95% CI)                                                                                                                                                                                        | <b>1.32 (1.05-1.66)</b> |                          | <b>0.61 (0.40-0.96)</b> |                                       |
|                                                                                                                                                                                                                 |                         |                          |                         |                                       |
| <b>Animal sources replaced with vegetable protein from high GI foods</b>                                                                                                                                        |                         |                          |                         |                                       |
| <i>Processed and red meat</i>                                                                                                                                                                                   |                         |                          |                         |                                       |
| HR <sup>1</sup> (95% CI)                                                                                                                                                                                        | <b>1.35 (1.06-1.72)</b> |                          | <b>0.56 (0.35-0.90)</b> |                                       |
| HR <sup>2</sup> (95% CI)                                                                                                                                                                                        | <b>1.40 (1.09-1.80)</b> |                          | <b>0.50 (0.31-0.82)</b> |                                       |
| <i>Poultry</i>                                                                                                                                                                                                  |                         |                          |                         |                                       |
| HR <sup>1</sup> (95% CI)                                                                                                                                                                                        | <b>1.33 (1.01-1.75)</b> |                          | 0.61 (0.36-1.06)        |                                       |
| HR <sup>2</sup> (95% CI)                                                                                                                                                                                        | <b>1.35 (1.02-1.79)</b> |                          | 0.59 (0.33-1.05)        |                                       |
| <i>Fish</i>                                                                                                                                                                                                     |                         |                          |                         |                                       |
| HR <sup>1</sup> (95% CI)                                                                                                                                                                                        | <b>1.43 (1.05-1.95)</b> |                          | 0.68 (0.37-1.23)        |                                       |
| HR <sup>2</sup> (95% CI)                                                                                                                                                                                        | <b>1.44 (1.05-1.96)</b> |                          | 0.66 (0.36-1.23)        |                                       |
| <i>Eggs and dairy products</i>                                                                                                                                                                                  |                         |                          |                         |                                       |
| HR <sup>1</sup> (95% CI)                                                                                                                                                                                        | <b>1.48 (1.17-1.87)</b> |                          | 0.64 (0.39-1.04)        |                                       |
| HR <sup>2</sup> (95% CI)                                                                                                                                                                                        | <b>1.53 (1.20-1.97)</b> |                          | <b>0.58 (0.35-0.95)</b> |                                       |
|                                                                                                                                                                                                                 |                         |                          |                         |                                       |
| <b>Animal sources replaced with vegetable protein from low GI foods</b>                                                                                                                                         |                         |                          |                         |                                       |
| <i>Processed and red meat</i>                                                                                                                                                                                   |                         |                          |                         |                                       |
| HR <sup>1</sup> (95% CI)                                                                                                                                                                                        | 0.85 (0.63-1.15)        |                          | 0.77 (0.45-1.31)        |                                       |
| HR <sup>2</sup> (95% CI)                                                                                                                                                                                        | 0.91 (0.66-1.25)        |                          | 0.62 (0.34-1.13)        |                                       |
| <i>Poultry</i>                                                                                                                                                                                                  |                         |                          |                         |                                       |
| HR <sup>1</sup> (95% CI)                                                                                                                                                                                        | 0.84 (0.60-1.18)        |                          | 0.84 (0.45-1.58)        |                                       |
| HR <sup>2</sup> (95% CI)                                                                                                                                                                                        | 0.88 (0.62-1.25)        |                          | 0.72 (0.36-1.44)        |                                       |
| <i>Fish</i>                                                                                                                                                                                                     |                         |                          |                         |                                       |
| HR <sup>1</sup> (95% CI)                                                                                                                                                                                        | 0.90 (0.63-1.30)        |                          | 0.93 (0.47-1.82)        |                                       |
| HR <sup>2</sup> (95% CI)                                                                                                                                                                                        | 0.93 (0.64-1.35)        |                          | 0.81 (0.40-1.66)        |                                       |
| <i>Eggs and dairy products</i>                                                                                                                                                                                  |                         |                          |                         |                                       |

|                                                                          |                         |       |                     |       |
|--------------------------------------------------------------------------|-------------------------|-------|---------------------|-------|
| HR <sup>1</sup> (95% CI)                                                 | 0.93 (0.70-1.24)        |       | 0.87 (0.52-1.47)    |       |
| HR <sup>2</sup> (95% CI)                                                 | 1.00 (0.73-1.35)        |       | 0.70 (0.39-1.28)    |       |
|                                                                          |                         |       |                     |       |
| <b>Body mass index&gt;25</b>                                             | <b>n. cases=281</b>     |       | <b>n. cases =62</b> |       |
|                                                                          |                         |       |                     |       |
| <b>Animal sources replaced with vegetable protein</b>                    |                         |       |                     |       |
| <i>Processed and red meat</i>                                            |                         |       |                     |       |
| HR <sup>1</sup> (95% CI)                                                 | <b>1.21 (1.03-1.43)</b> | 0.063 | 0.79 (0.57-1.10)    | 0.464 |
| HR <sup>2</sup> (95% CI)                                                 | <b>1.22 (1.03-1.45)</b> | 0.072 | 0.78 (0.54-1.11)    | 0.411 |
| <i>Poultry</i>                                                           |                         |       |                     |       |
| HR <sup>1</sup> (95% CI)                                                 | 1.04 (0.87-1.25)        | 0.720 | 0.78 (0.53-1.14)    | 0.754 |
| HR <sup>2</sup> (95% CI)                                                 | 1.02 (0.85-1.23)        | 0.595 | 0.78 (0.52-1.17)    | 0.776 |
| <i>Fish</i>                                                              |                         |       |                     |       |
| HR <sup>1</sup> (95% CI)                                                 | 0.99 (0.82-1.21)        | 0.376 | 0.90 (0.58-1.41)    | 0.650 |
| HR <sup>2</sup> (95% CI)                                                 | 0.98 (0.81-1.20)        | 0.328 | 0.88 (0.55-1.41)    | 0.627 |
| <i>Egg and dairy products</i>                                            |                         |       |                     |       |
| HR <sup>1</sup> (95% CI)                                                 | 1.02 (0.88-1.19)        | 0.195 | 0.85 (0.62-1.18)    | 0.927 |
| HR <sup>2</sup> (95% CI)                                                 | 1.03 (0.88-1.20)        | 0.243 | 0.83 (0.59-1.18)    | 0.661 |
|                                                                          |                         |       |                     |       |
| <b>Animal sources replaced with vegetable protein from high GI foods</b> |                         |       |                     |       |
| <i>Processed and red meat</i>                                            |                         |       |                     |       |
| HR <sup>1</sup> (95% CI)                                                 | <b>1.30 (1.09-1.55)</b> | 0.066 | 0.76 (0.53-1.10)    | 0.286 |
| HR <sup>2</sup> (95% CI)                                                 | <b>1.30 (1.09-1.56)</b> | 0.073 | 0.75 (0.51-1.10)    | 0.398 |
| <i>Poultry</i>                                                           |                         |       |                     |       |
| HR <sup>1</sup> (95% CI)                                                 | 1.11 (0.91-1.34)        | 0.732 | 0.75 (0.50-1.13)    | 0.757 |
| HR <sup>2</sup> (95% CI)                                                 | 1.08 (0.89-1.31)        | 0.607 | 0.76 (0.49-1.16)    | 0.768 |
| <i>Fish</i>                                                              |                         |       |                     |       |
| HR <sup>1</sup> (95% CI)                                                 | 1.06 (0.86-1.30)        | 0.412 | 0.88 (0.55-1.40)    | 0.675 |
| HR <sup>2</sup> (95% CI)                                                 | 1.04 (0.85-1.28)        | 0.356 | 0.85 (0.52-1.39)    | 0.640 |
| <i>Eggs and dairy products</i>                                           |                         |       |                     |       |
| HR <sup>1</sup> (95% CI)                                                 | 1.11 (0.94-1.31)        | 0.190 | 0.81 (0.56-1.18)    | 0.932 |
| HR <sup>2</sup> (95% CI)                                                 | 1.10 (0.93-1.31)        | 0.236 | 0.80 (0.54-1.17)    | 0.663 |
|                                                                          |                         |       |                     |       |
| <b>Animal sources replaced with vegetable protein from low GI foods</b>  |                         |       |                     |       |
| <i>Processed and red meat</i>                                            |                         |       |                     |       |
| HR <sup>1</sup> (95% CI)                                                 | 1.06 (0.86-1.32)        | 0.060 | 0.88 (0.58-1.33)    | 0.303 |
| HR <sup>2</sup> (95% CI)                                                 | 1.07 (0.85-1.34)        | 0.069 | 0.88 (0.53-1.46)    | 0.426 |
| <i>Poultry</i>                                                           |                         |       |                     |       |
| HR <sup>1</sup> (95% CI)                                                 | 0.91 (0.71-1.14)        | 0.759 | 0.87 (0.54-1.40)    | 0.781 |
| HR <sup>2</sup> (95% CI)                                                 | 0.89 (0.69-1.13)        | 0.629 | 1.14 (0.69-1.90)    | 0.809 |
| <i>Fish</i>                                                              |                         |       |                     |       |
| HR <sup>1</sup> (95% CI)                                                 | 0.86 (0.68-1.10)        | 0.394 | 1.01 (0.60-1.68)    | 0.680 |
| HR <sup>2</sup> (95% CI)                                                 | 0.86 (0.67-1.10)        | 0.342 | 0.99 (0.57-1.70)    | 0.649 |
| <i>Eggs and dairy products</i>                                           |                         |       |                     |       |
| HR <sup>1</sup> (95% CI)                                                 | 0.91 (0.74-1.10)        | 0.189 | 0.94 (0.63-1.39)    | 0.932 |
| HR <sup>2</sup> (95% CI)                                                 | 0.90 (0.73-1.12)        | 0.234 | 0.92 (0.60-1.42)    | 0.655 |

<sup>1</sup> Stratified by center, age, sex and adjusted for energy, alcohol and total fat intake. <sup>2</sup> Additionally adjusted also for BMI, waist-hip ratio, smoking, education, physical activity and fiber intake. <sup>3</sup> Test for heterogeneity comparing BMI  $\leq 25$  and BMI  $> 25$ .
